# Supplementary material for: High-Affinity Inhibitors of Human NAD+-Dependent 15-Hydroxyprostaglandin Dehydrogenase: Mechanisms of Inhibition and Structure-Activity Relationships
Source: PLOS journal article supplement (doi:10.1371/journal.pone.0013719), 2010-11-02
Supplement: S5 (10.1371/journal.pone.0013719.s005) [file journal.pone.0013719.s005]

## High-affinity Inhibitors of Human NAD<sup>+</sup>-dependent 15-Hydroxyprostaglandin Dehydrogenase: Mechanisms of Inhibition and Structure-activity Relationships

Frank H. Niesen, Lena Schultz, Ajit Jadhav, Chitra Bhatia, Kunde Guo, David J Maloney, Ewa S. Pilka, Minghua Wang, Udo Oppermann, Tom D. Heightman and Anton Simeonov

### SUPPLEMENTARY INFORMATION FIGURE S3

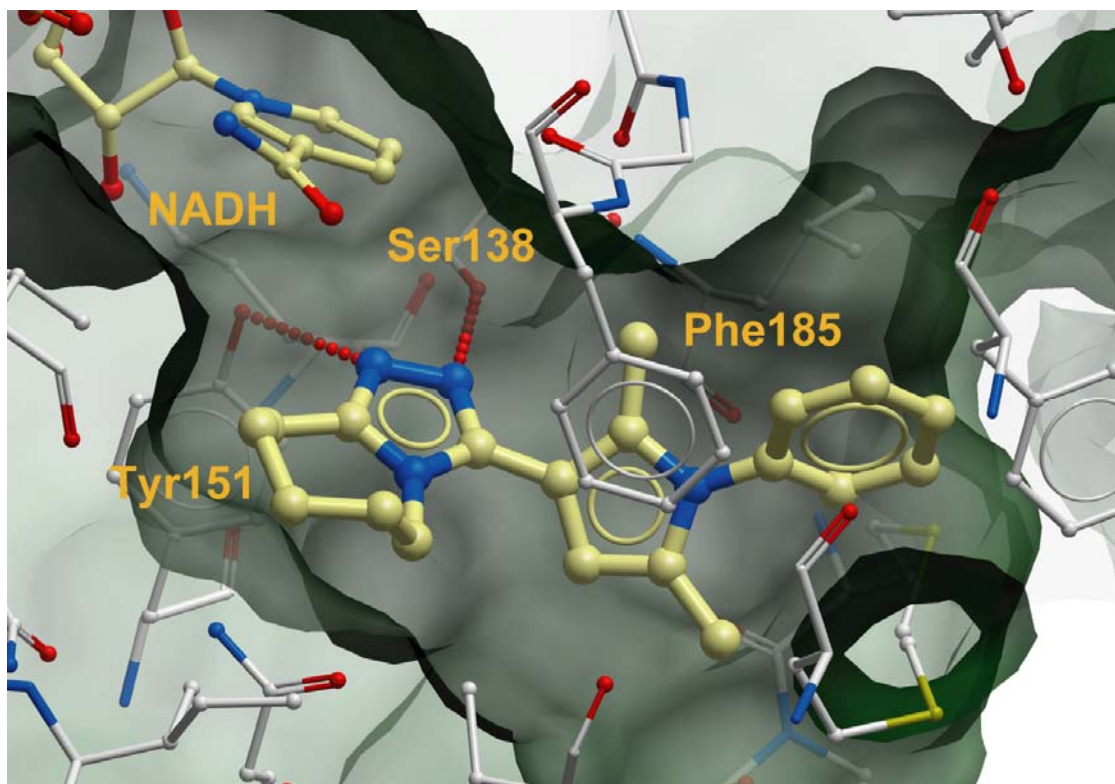

**Binding of the inhibitor 72 in the active site of 15-PGDH as predicted by docking studies.** The view shows a cut-through into the substrate pocket of 15-PGDH, with the volume of the pocket indicated by a green mesh. Key amino acid residues are labelled. The figures were created using ICM (Molsoft, LLC).
